# Supplementary material
Source: PubMed Central journal article supplement (PMC4882421)
Supplement: 10.1074_M115.702092_jbc.M115.702092-1.pdf [file 10.1074_M115.702092_jbc.M115.702092-1.pdf]

Supp. Table 1. Iwanowycz et al. (2015)

**Supplemental table 1.** Antibodies used for western blots and ChIP procedures

| <b>Antibodies</b>  | <b>Procedure</b> | <b>Product #</b> | <b>Company</b> |
|--------------------|------------------|------------------|----------------|
| p65                | Western          | 8242             | Cell Signaling |
| STAT1              | Western          | sc-346           | Santa Cruz     |
| STAT6              | Western          | 9362             | Cell Signaling |
| IRF4               | Western          | sc-6059          | Santa Cruz     |
| IRF5               | Western          | 4950             | Cell Signaling |
| Actin              | Western          | A2066            | Sigma          |
| TBP                | Western          | ab51841          | Abcam          |
| H3K27m3            | ChIP             | ab6002           | Abcam          |
| H3K27m3            | Western          | 07-449           | Millipore      |
| H3K27ac            | Western/Chip     | AB4729           | Abcam          |
| H3                 | Western          | 05-928           | Millipore      |
| Anti-rabbit<br>HRP | Western          | sc-2004          | Santa Cruz     |
| Anti-Mouse<br>HRP  | Western          | sc-2005          | Santa Cruz     |
| Anti-goat<br>HRP   | Western          | sc-2024          | Santa Cruz     |

Supp. Table 2. Iwanowycz et al. (2015)

**Supplemental Table 2.** Primers used for RT-qPCR

| <b>Primers</b> | <b>Forward</b>             | <b>Reverse</b>             |
|----------------|----------------------------|----------------------------|
| 18s            | CGCGGTTCTATTTTGTGGT        | AGTCGGCATCGTTTATGGTC       |
| TNF            | CGT CAG CCG ATT TGC TAT CT | CGG ACT CCG CAA AGT CTA AG |
| CXCL2          | CGCTGTCAATGCCTGAAG         | GGCGTCACACTCAAGCTCT        |
| CXCL10         | TGAATCCGGAATCTAAGACCATCAA  | AGGACTAGCCATCCACTGGGTAAAG  |
| MRC1           | TGGATGGATGGGAGCAAAGT       | AATGCCAACCTTCCTTGCAG       |
| IRF5           | CAGGTGAACAGCTGCCAGTA       | CTCATCCACCCCTTCAGTGT       |
| SOCS1          | TTAACCCGGTACTCCGTGAC       | GAGGTCTCCAGCCAGAAGTG       |
| CCL2           | CAGGTCCCTGTCATGCTTCT       | TCTGGACCCATTCTTCTTG        |
| IL1b           | GCCATCCTCTGTGACTCAT        | AGGCCACAGGTATTTTGTCTG      |
| INOS           | CACCTTGAGTTCACCCAGT        | ACCACTCGTACTTGGGATGC       |
| IL6            | AGTTGCCTTCTTGGGACTGA       | TCCACGATTTCCAGAGAAC        |
| TLR4           | GCTTTCACCTCTGCCTTAC        | GAAACTGCCATGTTTGAGCA       |
| MMP2           | ACACTGGGACCTGTCACTCC       | GCGAAGAACACAGCCTTCTC       |
| MMP9           | CATTCGCGTGGATAAGGAGT       | ACCTGGTTCACCTCATGGTC       |
| Arg1           | TTTTTCCAGCAGACCAGCTT       | GGAACCCAGAGAGAGCATGA       |
| Chi313         | TGGAATTGGTGCCCCTACAA       | CCACGGCACCTCCTAAATTG       |
| IRF4           | GCAGCTCACTTTGGATGACA       | CCAAACGTCACAGGACATTG       |
| CSFr1          | TTGGACTGGCTAGGGACATC       | GGTTCAGACCAAGCGAGAAG       |
| CDKNn1a        | CAAAGTGTGCCGTTGTCTCT       | AGGAAGTACTGGGCCTCTTG       |

Supp. Table 3. Iwanowycz et al. (2015)

**Supplemental Table 3.** Primers used for CHIP-PCR. P-promoter

|        | <b>Forward</b>          | <b>Reverse</b>        | <b>Region</b> | <b>IP</b>           |
|--------|-------------------------|-----------------------|---------------|---------------------|
| INOS-1 | TCCCTAGTGAGTCCCAGTTTTGA | CTGGTCGCCC GTCCAAGG   | P             | H3K27m3             |
| INOS-2 | GCGCTCTAGTGAAGCAAAGG    | TCTTAGTGGCC CAGGACAAG | CpG           | H3K27ac             |
| TNF    | AGGAGAAGGCTTGTGAGGTC    | GAGTTGGGAAGTGTGCATGG  | P             | H3K27m3             |
| IL6    | AGGAGTGTGAGGCAGAGAGC    | GTCTCCTCTCCGGACTTGTG  | Intron        | H3K27m3             |
| IRF4   | CACGTGATGGTCTCTGGTTG    | TCATCCCACTTTTCCCTCAC  | P             | H3K27m3,<br>H3K27ac |
| ARG1-1 | TGAACAGGCTGTATTAGCCAACA | AGCACCCCTCAACCCAAAGTG | P             | H3K27m3             |
| ARG1-2 | AGTTCCTCTGATGGGGAGGT    | TCATGCTCTCTCTGGGTTC   | P             | H3K27ac             |
| YM1    | ACTTGCAACTACTCTGCACT    | ACACCCCTGAGCTTTGGTAA  | P             | H3K27m3,<br>H3K27ac |

Supp. Table 4. Iwanowycz et al. (2015)

**Supplemental Table 4.** Genes that were inversely regulated by emodin under the two different treatments. Column 2 lists the fold change of the LPS/IFN $\gamma$ +emodin group compared to the LPS/IFN $\gamma$  group. Column 3 lists fold change of IL4+emodin compared to IL4 treatment. Red=increased expression; green=repressed expression.

| Gene          | Em+LPS vs LPS/IFN | Em+IL4 vs IL4 |
|---------------|-------------------|---------------|
| Rab3il1       | 2.66              | -16.18        |
| Mrgprg        | 2.18              | -16.05        |
| Gprc5c        | 3.74              | -8.77         |
| Ikzf2         | 3.42              | -6.36         |
| Kctd12b       | 3.62              | -5.06         |
| Ear1          | 2.04              | -4.71         |
| Jakmip1       | 9.59              | -4.67         |
| Trim45        | 4.00              | -4.60         |
| Snn           | 2.13              | -4.52         |
| Chi3l3        | 2.04              | -4.24         |
| Cmb1          | 5.87              | -4.21         |
| Ubtf          | 2.47              | -4.20         |
| Xpo7          | 2.41              | -4.00         |
| Ear2          | 2.03              | -4.00         |
| Gpr77         | 3.05              | -3.71         |
| Mnt           | 2.31              | -3.70         |
| Gm4610        | 8.80              | -3.53         |
| Igf1          | 2.12              | -3.47         |
| Armcx6        | 2.81              | -3.43         |
| S100a4        | 3.02              | -3.36         |
| Islr2         | 3.58              | -3.34         |
| Sult1a1       | 2.95              | -3.15         |
| 9230110K08Rik | 3.15              | -2.88         |
| Senp8         | 2.13              | -2.88         |
| Zfp473        | 3.06              | -2.82         |
| Itga4         | 4.86              | -2.82         |
| Cables1       | 3.87              | -2.76         |
| Klf11         | 2.47              | -2.74         |
| A930006K02Rik | 2.18              | -2.72         |
| BC031361      | 2.05              | -2.68         |
| 6430531B16Rik | 2.25              | -2.65         |
| Taf6l         | 2.04              | -2.62         |

|               |        |       |
|---------------|--------|-------|
| Nudt16l1      | 2.01   | -2.59 |
| Tbc1d16       | 3.26   | -2.57 |
| Scgb2b27      | 2.23   | -2.56 |
| BC025920      | 2.91   | -2.51 |
| Ccl9          | 5.28   | -2.48 |
| Bcl9          | 2.64   | -2.43 |
| 1700097N02Rik | 2.01   | -2.42 |
| Gzmm          | 3.64   | -2.40 |
| Ear11         | 3.20   | -2.39 |
| Hfe           | 3.09   | -2.36 |
| AW555355      | 2.31   | -2.34 |
| D230044B12Rik | 2.39   | -2.30 |
| Mrc1          | 8.72   | -2.29 |
| Rassf2        | 2.62   | -2.29 |
| Acp5          | 2.02   | -2.22 |
| Inpp5j        | 5.52   | -2.21 |
| AA914427      | 3.21   | -2.20 |
| A430110L20Rik | 2.47   | -2.19 |
| Metrn1        | 2.02   | -2.19 |
| Gm9484        | 3.19   | -2.13 |
| Gdf3          | 3.34   | -2.12 |
| Selp          | 3.09   | -2.08 |
| Ier5l         | 3.05   | -2.04 |
| Cdk14         | -2.71  | 2.03  |
| 3930401B19Rik | -2.72  | 2.04  |
| Tgfb1         | -3.22  | 2.06  |
| Cpd           | -2.21  | 2.06  |
| Fzd1          | -2.45  | 2.08  |
| Klra2         | -14.35 | 2.10  |
| Prkar2b       | -4.32  | 2.12  |
| Apol9a        | -4.48  | 2.16  |
| Chpt1         | -4.06  | 2.20  |
| Ass1          | -6.11  | 2.22  |
| Slc7a3        | -3.03  | 2.23  |
| Gm20186       | -2.65  | 2.26  |
| Procr         | -2.07  | 2.38  |
| Ppap2b        | -2.13  | 2.55  |
| Ptgs2         | -3.99  | 2.56  |
| Tnf           | -2.01  | 2.69  |
| Clec4n        | -2.63  | 2.94  |
| Smtnl2        | -4.06  | 2.96  |

|          |        |       |
|----------|--------|-------|
| Thbs1    | -6.51  | 3.22  |
| Jag1     | -11.28 | 3.54  |
| Dusp14   | -3.14  | 3.62  |
| Hmga2    | -2.02  | 3.79  |
| Pla2g5   | -4.28  | 4.26  |
| Flrt3    | -4.09  | 4.37  |
| Cck      | -25.26 | 4.53  |
| Serpine1 | -23.78 | 6.13  |
| Clec9a   | -4.62  | 7.13  |
| Cxcl3    | -37.91 | 7.37  |
| Tnfaip6  | -16.37 | 9.27  |
| Cxcl10   | -10.31 | 15.05 |
| Cxcl2    | -2.47  | 60.63 |

Supp. Table 5. Iwanowycz et al. (2015)

**Supplemental table 5.** Histone modifying enzymes significantly changed by emodin compared to LPS/IFN $\gamma$  (top) or IL4 (bottom) treatment

| <b>Histone modifying enzymes changed by emodin</b> |            |               |
|----------------------------------------------------|------------|---------------|
|                                                    | <b>LPS</b> | <b>LPS+Em</b> |
| EZH1                                               | N.C.       | 6.63          |
| EZH2                                               | N.C.       | 2.73          |
| Hdac1                                              | N.C.       | -2.30         |
| Hdac8                                              | N.C.       | -4.08         |
| KAT2B                                              | 2.33       | -4.69         |
| KAT6B                                              | -2.41      | 3.65          |
| KDM3B                                              | N.C.       | 2.12          |
| KDM4A                                              | N.C.       | 9.21          |
| NCOA3                                              | N.C.       | 2.58          |
| NSD1                                               | -2.06      | 2.46          |
| PHF8                                               | -2.35      | 3.62          |
| PRDM2                                              | 2.18       | 3.78          |
| SETD1B                                             | N.C.       | 2.09          |
| SETD7                                              | N.C.       | 2.06          |
| Sirt5                                              | -2.06      | -4.41         |
| Sirt7                                              | N.C.       | 2.06          |
| SMYD2                                              | N.C.       | -3.02         |
| SUV420H1                                           | N.C.       | 3.06          |
| Mll1                                               | N.C.       | 3.09          |
|                                                    |            |               |
|                                                    | <b>IL4</b> | <b>IL4+Em</b> |
| EZH1                                               | N.C.       | -6.26         |
| EZH2                                               | N.C.       | -2.04         |
| Hdac1                                              | N.C.       | 2.32          |
| Hdac8                                              | N.C.       | 2.33          |
| Hdac9                                              | N.C.       | 4.39          |
| KAT2B                                              | N.C.       | 3.81          |
| KAT6B                                              | N.C.       | -2.70         |
| KDM2A                                              | N.C.       | 2.04          |
| KDM4A                                              | N.C.       | -7.58         |
| KDM4B                                              | N.C.       | 2.11          |
| KDM5B                                              | N.C.       | -2.13         |
| KDM6B                                              | -2.20      | 1.91          |
| Mll1                                               | N.C.       | -2.20         |

|          |      |       |
|----------|------|-------|
| Mll2     | N.C. | -2.64 |
| NCOA2    | N.C. | 2.60  |
| PHF8     | N.C. | -5.60 |
| PRDM2    | N.C. | -2.26 |
| Sirt7    | N.C. | -2.30 |
| SMYD3    | N.C. | -2.79 |
| SUV420H1 | N.C. | -2.46 |
